# Supplementary material for: Fabrication of Photomagnetic Carbon Surfaces via Redox Assembly
Source: Hindawi journal article supplement (doi:10.1155/2017/6058216), 2017-01-01
Supplement: f1 [file 6058216.f1.pdf]

## Supporting Material

### Fabrication of Photomagnetic Carbon Surfaces via Redox Assembly

Yan-Ling Song and Chong Mou Wang

Department of Chemistry, National Taiwan Normal University, Taipei 116, Taiwan

In this work,  $\text{Ru}(\text{bpy})_2(\text{phen-dione})^{2+}$  was synthesized by reacting  $\text{Ru}(\text{bpy})_2\text{Cl}_2 \cdot 2\text{H}_2\text{O}$  with phen-dione in a molar ratio of 1:1.2 under a reflux in  $\text{CH}_3\text{OH}/\text{H}_2\text{O}$  (volume ratio 1:1). The product was purified via recrystallization in ether prior to its application in surface modification. The X-ray structure is shown in Figure S1.

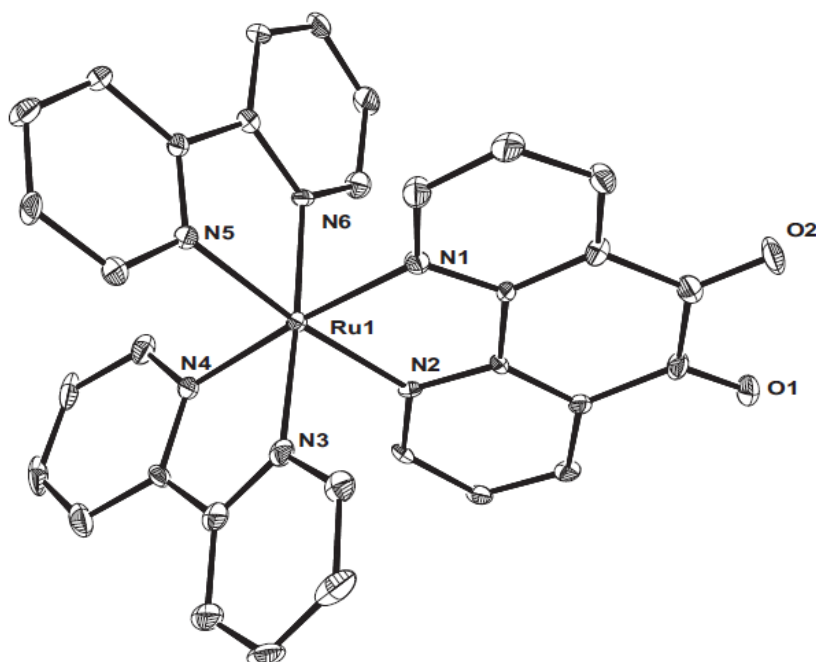

FIGURE S1: The X-ray crystal structure of  $\text{Ru}(\text{bpy})_2(\text{phen-dione})^{2+}$ .

For EIS analysis, data simulations were carried out based on a simplified Randles circuit (Figure S2) with the software provided by Autolab.

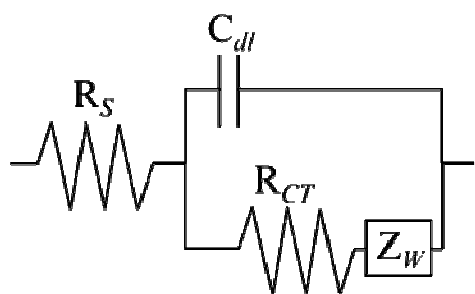

FIGURE S2: A simplified Randles circuit used for EIS data fitting.

When APBA was diazotized in acidic  $\text{NaNO}_2$  solutions and subsequently reduced by HOPG electrodes, STM showed that nanoscale films were formed and deposited on the electrodes.  $\text{Ru}(\text{bpy})_2(\text{phendione})^{2+}$  could thus be adhered to the electrodes after the phendione ligand was reduced to the corresponding alcohol. The ratio of thickness of the APBA layer to the  $\text{Ru}(\text{bpy})_2(\text{phendione})^{2+}$  film was roughly 1:2. Surface scratch experiments, Figure S3, confirmed the STM results. The thickness of the APBA film was 0.25 nm, and 0.38 nm, for the ruthenium layer.

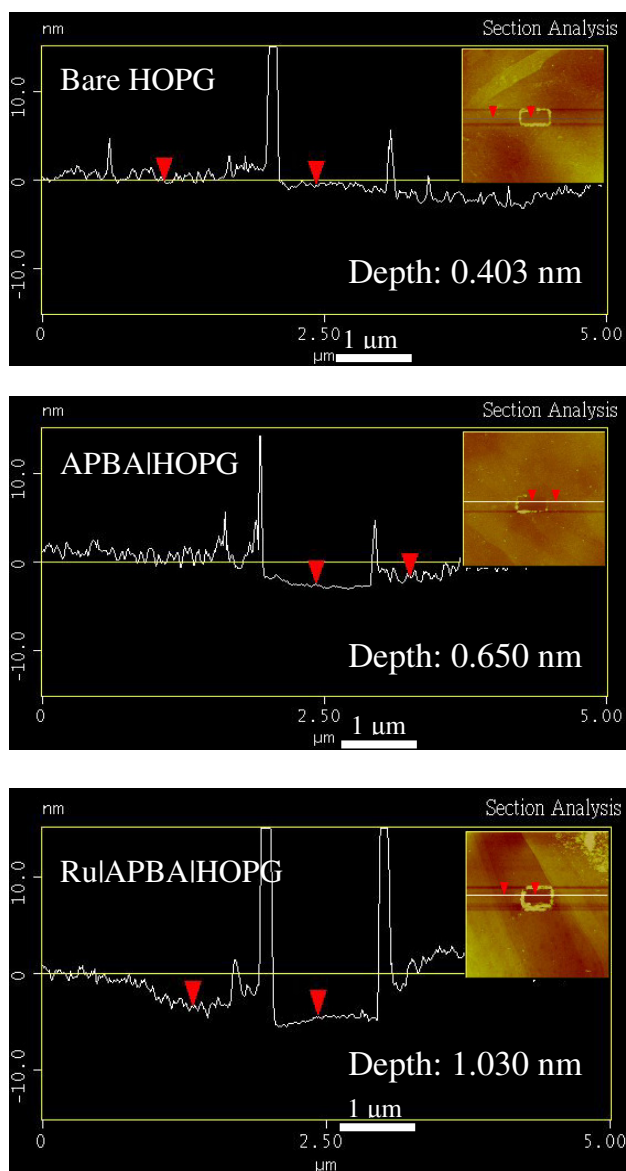

FIGURE S3: Surface scratching for bare HOPG, APBA/HOPG, and Ru/APBA/HOPG. Scan size: 5  $\mu\text{m} \times 5 \mu\text{m}$ ; scratch size: 1  $\mu\text{m} \times 0.5 \mu\text{m}$ .

Phendione can form boronate ester with APBA after being reduced to phendiol. This reactivity was identified by in situ STM, in which the surface roughness ( $r$ ) of the APBA-modified electrode increased significantly when the electrode potential ( $E$ ) became more negative than 0 V vs. SCE. In contrast, trivial  $r$  was observed if APBA was excluded from the electrodes, as shown in Figure S4. The contrast indicates that APBA is an effective adhesive for  $\text{Ru}(\text{bpy})_2(\text{phendione})^{2+}$  to carbon substrates.

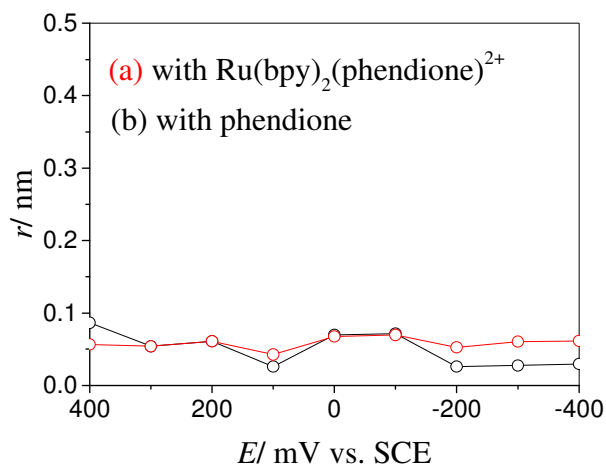

FIGURE S4: Correlations between the  $r$  of bare HOPG electrodes and  $E$  in the presence of 1 mM of  $\text{Ru}(\text{bpy})_2(\text{phendione})^{2+}$  (a) or phendione (b).

EIS measurements for the  $R_{CT}$  of  $\text{Fe}(\text{CN})_6^{3-/4-}$  at the HOPG electrodes showed that the solution resistance ( $R_s$ ), the double-layer capacitance ( $C_{dl}$ ), and the Warburg impedance ( $Z_w$ ) also changed systematically with the increase in the number of repetition of the electrodes being treated with APBA and the ruthenium complex, but in a minor way. The results are shown in Figure S5 for comparison.

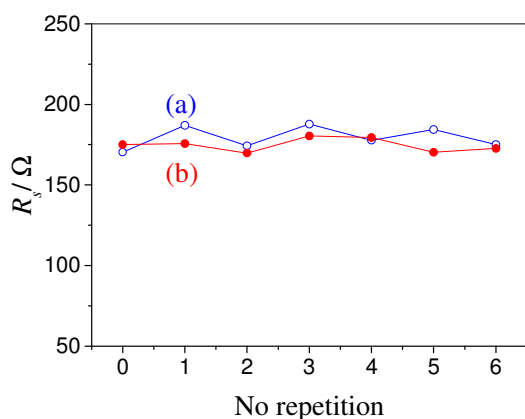

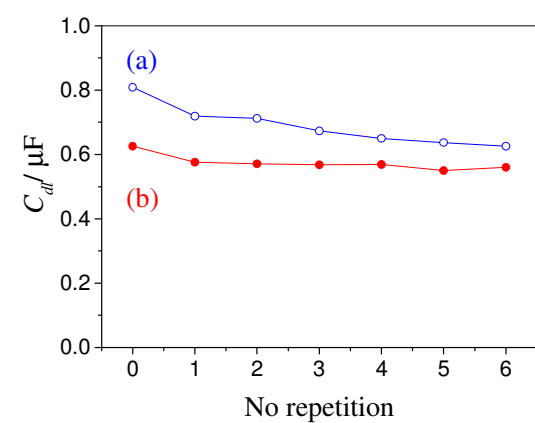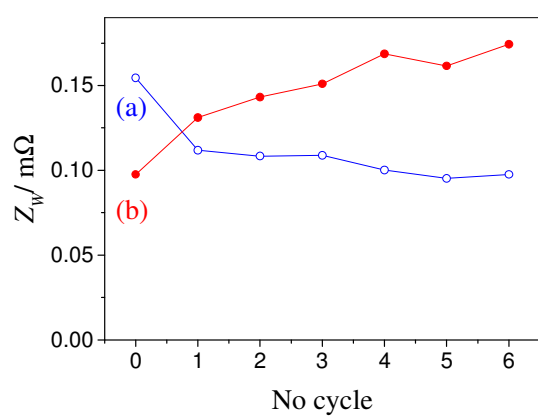

FIGURE S5: Correlations of  $R_s$ ,  $C_{dl}$ , and  $Z_W$  with the number of repetitions (No.) of the HOPG electrode being treated with 1 mM APBA (a) and further with 1 mM of  $\text{Ru}(\text{bpy})_2(\text{phen})^{2+}$  (b).
